# Supplementary material for: Improving health from the inside: Use of engineered intestinal microorganisms as in situ cytokine delivery system
Source: PubMed Central journal article supplement — Bioengineered. 2012 Oct 30;4(3):172–9. doi: 10.4161/bioe.22646 (PMC3669160; doi:10.4161/bioe.22646), 2012-10-30
Supplement: bbug-4-172-s01.pdf [file bbug-4-172-s01.pdf]

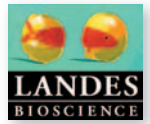

## **Supplemental Material to:**

**Christoph Pöhlmann, Mandy Thomas, Manuela Brandt,  
Maike Hartmann, André Bleich and Florian Gunzer**

**Improving health from the inside: use of engineered  
intestinal microorganisms as in situ cytokine delivery  
system**

**Bioengineered 2013; 4(3)**

**<http://dx.doi.org/10.4161/bioe.22646>**

**<http://www.landesbioscience.com/journals/bioe/article/22646/>**

Supplement:

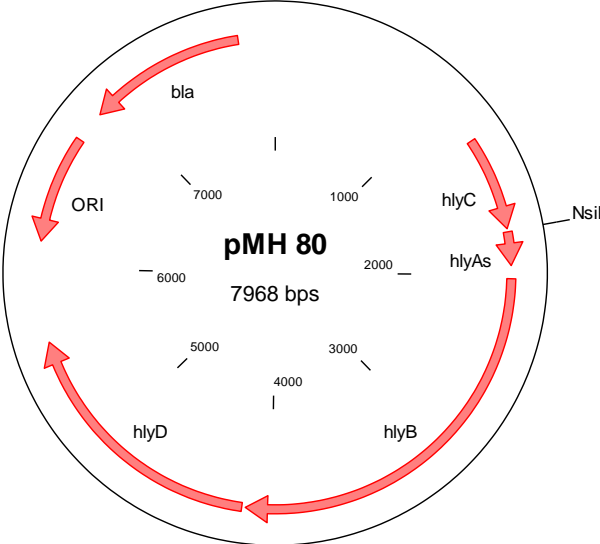

Suppl. 1A

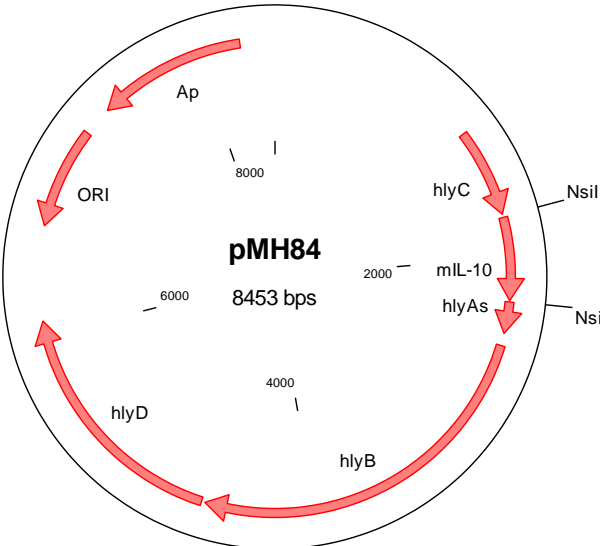

Suppl. 1B

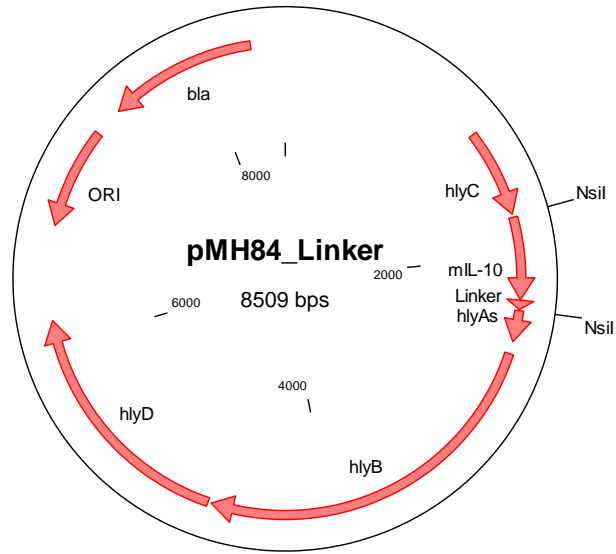

**Suppl. 1C**

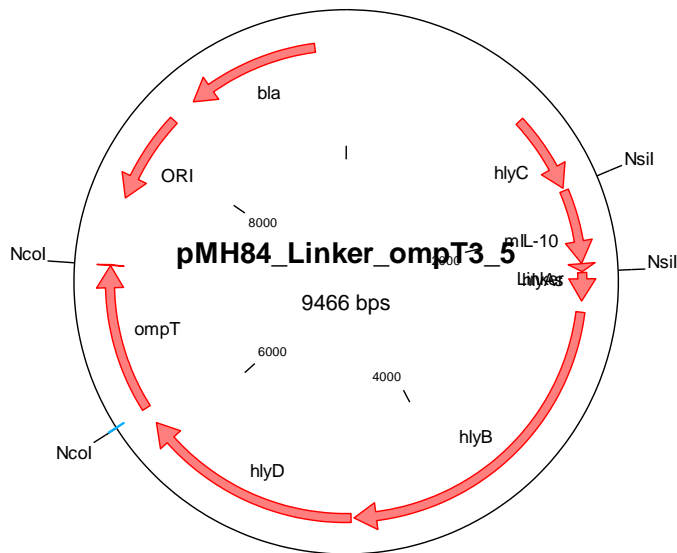

**Suppl. 1D**

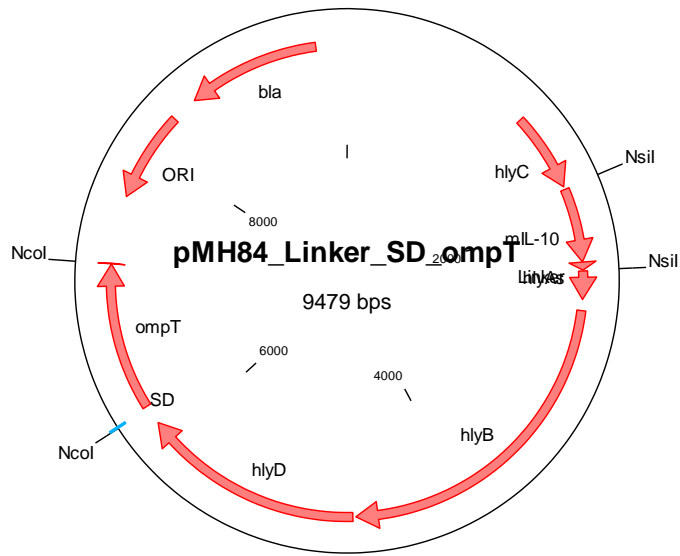

Suppl. 1E

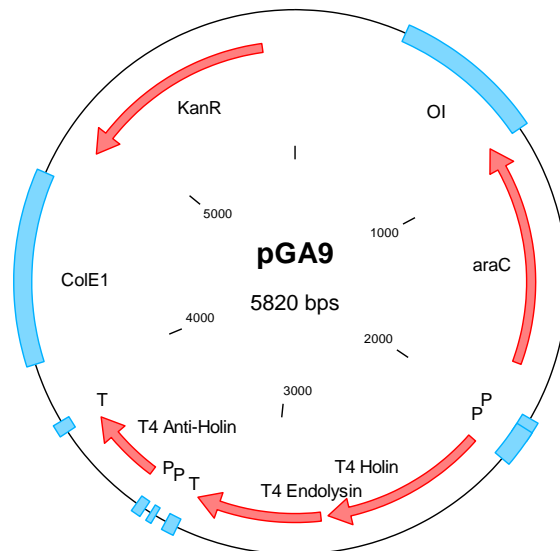

Suppl. 1F
